# Supplementary material
Source: HighWire-hosted journal article supplement (https://bmjopen.bmj.com/content/11/2/e045006)
Supplement: inline-supplementary-material-1 [file inline-supplementary-material-1.pdf]

Online Supplementary Materials – Bombay et al.

### Online Supplementary Appendix 1

Database: Ovid MEDLINE(R) ALL <1946 to November 25, 2020> Search Strategy:

1. exp pregnancy/
2. exp pregnancy trimesters/
3. pregnan\*.tw.
4. prenatal care/
5. postnatal care/
6. perinatal care/
7. Pregnant Women/
8. (prenatal or pre-natal or postnatal or post-natal or perinatal or peri-natal or antenatal or ante-natal or postpartum or post-partum or parturition or puerperium or gestation or gestating or gestate).tw.
9. exp Postpartum Period/
10. exp Breast Feeding/
11. Milk, Human/
12. (breastfeeding\* or breast feeding\* or lactation or lactating or breast milk or breastmilk or human milk or chest milk or chestmilk).tw.
13. exp Fertility/
14. exp Fertility Agents/
15. Fertility Preservation/
16. Involuntary Fertility Control/
17. exp Infertility/
18. exp Fertilization/
19. (fertil\* or infertil\* or fecund\* or subfecund\* or steril\* or subfertil\* or sub-fertil\*).tw.
20. (fertiliz\* or conception\* or conceiv\*).tw.
21. or/1-20
22. Cannabis/
23. exp "Marijuana Use"/
24. exp cannabinoids/ or Medical marijuana/ or Marijuana abuse/
25. (cannabi\* or marijuana\* or marihuana\* or bhang or bhangs or ganja or ganjas or hashish or hashishs or hash or hemp or hems or ganjah or cannador or charas or kush or weed or dronabinol or cannabichromene or THC or CBD or nabilone or tetrahydrocannabivarin or ganka or marinol or cesamet or dexamabinol or sativex or "HU211" or "HU 211" or indica or syndros or cannabinoid or cannabinoids or cannabidiol or nabiximols or namisol).tw.
26. ((blunt or blunts) adj2 smok\*).tw.
27. or/22-26
28. exp Canada/
29. (canada or alberta or british columbia or yukon or northwest territories or nunavut or manitoba or saskatchewan or ontario or quebec or newfoundland or prince edward island or nova scotia or new brunswick).tw.
30. Canada.cp.
31. 28 or 29 or 30
32. 21 and 27 and 31
33. limit 32 to yr="2010 -Current"

\*\*\*\*\*
