# Supplementary material
Source: HighWire-hosted journal article supplement (https://bmjopen.bmj.com/content/11/2/e045006)
Supplement: inline-supplementary-material-2 [file inline-supplementary-material-2.pdf]

Online Supplementary Materials – Bombay et al.

## Online Supplementary Appendix 2

Organization webpages to be included in the grey literature search

| Organization or Society                          | Setting | Webpage                                                                                                         |
|--------------------------------------------------|---------|-----------------------------------------------------------------------------------------------------------------|
| Canada FASD Research Network (CANFASD)           | Canada  | <a href="https://canfasd.ca/">https://canfasd.ca/</a>                                                           |
| Canadian Association of Midwives                 | Canada  | <a href="https://canadianmidwives.org/">https://canadianmidwives.org/</a>                                       |
| Canadian Centre on Substance Use and Addiction   | Canada  | <a href="https://www.ccsa.ca/">https://www.ccsa.ca/</a>                                                         |
| Canadian Nurses Association                      | Canada  | <a href="https://www.cna-aic.ca/en">https://www.cna-aic.ca/en</a>                                               |
| Canadian Pediatric Society                       | Canada  | <a href="https://www.cps.ca/">https://www.cps.ca/</a>                                                           |
| Government of Canada                             | Canada  | <a href="https://www.canada.ca/en.html">https://www.canada.ca/en.html</a>                                       |
| Pregnancy Info                                   | Canada  | <a href="https://www.pregnancyinfo.ca/">https://www.pregnancyinfo.ca/</a>                                       |
| Society of Obstetricians and Gynaecologists      | Canada  | <a href="https://sogc.org/">https://sogc.org/</a>                                                               |
| Canadian Fertility and Andrology Society Website | Canada  | <a href="https://cfas.ca/">https://cfas.ca/</a>                                                                 |
| Canadian Public Health Association               | Canada  | <a href="https://www.cpha.ca/">https://www.cpha.ca/</a>                                                         |
| National Aboriginal Council of Midwives          | Canada  | <a href="https://indigenousmidwifery.ca/become-a-midwife/">https://indigenousmidwifery.ca/become-a-midwife/</a> |
| The MoTHERS Program                              | Canada  | <a href="https://www.themothersprogram.ca/about">https://www.themothersprogram.ca/about</a>                     |
| Alberta Association of Midwives                  | Alberta | <a href="https://www.alberta-midwives.ca/">https://www.alberta-midwives.ca/</a>                                 |
| Alberta Health Services                          | Alberta | <a href="https://www.albertahealthservices.ca/">https://www.albertahealthservices.ca/</a>                       |
| Government of Alberta                            | Alberta | <a href="https://www.alberta.ca/index.aspx">https://www.alberta.ca/index.aspx</a>                               |

## Online Supplementary Materials – Bombay et al.

|                                                      |                                           |                                                                                               |
|------------------------------------------------------|-------------------------------------------|-----------------------------------------------------------------------------------------------|
| BC Women's Hospital and Health Centre                | British Columbia                          | <a href="http://www.bcwomens.ca/">http://www.bcwomens.ca/</a>                                 |
| Centre of Excellence for Women's Health              | British Columbia                          | <a href="https://bccewh.bc.ca/">https://bccewh.bc.ca/</a>                                     |
| First Nations Health Authority                       | British Columbia                          | <a href="https://www.fnha.ca/">https://www.fnha.ca/</a>                                       |
| Fraser Health Authority                              | British Columbia                          | <a href="https://www.fraserhealth.ca/">https://www.fraserhealth.ca/</a>                       |
| Government of BC                                     | British Columbia                          | <a href="https://www2.gov.bc.ca/gov/content/home">https://www2.gov.bc.ca/gov/content/home</a> |
| HealthLink BC                                        | British Columbia                          | <a href="https://www.healthlinkbc.ca/">https://www.healthlinkbc.ca/</a>                       |
| Midwives association of British Columbia             | British Columbia                          | <a href="https://www.bcmidwives.com/">https://www.bcmidwives.com/</a>                         |
| Perinatal Services BC                                | British Columbia                          | <a href="http://www.perinatalservicesbc.ca/">http://www.perinatalservicesbc.ca/</a>           |
| Government of Manitoba                               | Manitoba                                  | <a href="https://www.gov.mb.ca/">https://www.gov.mb.ca/</a>                                   |
| Midwives Association of Manitoba                     | Manitoba                                  | <a href="http://midwivesofmanitoba.ca/">http://midwivesofmanitoba.ca/</a>                     |
| Government of New Brunswick                          | New Brunswick                             | <a href="https://www2.gnb.ca/">https://www2.gnb.ca/</a>                                       |
| Public Health Association of NB and PEI              | New Brunswick,<br>Prince Edward<br>Island | <a href="http://www.nbpeipublichealth.ca/">http://www.nbpeipublichealth.ca/</a>               |
| Association of midwives of newfoundland and Labrador | Newfoundland                              | <a href="http://www.amnl.ca/">http://www.amnl.ca/</a>                                         |
| Government of Newfoundland and Labrador              | Newfoundland                              | <a href="https://www.gov.nl.ca/">https://www.gov.nl.ca/</a>                                   |
| Government of NWT                                    | North West<br>Territories                 | <a href="https://www.gov.nt.ca/">https://www.gov.nt.ca/</a>                                   |
| Association of Nova Scotia Midwives                  | Nova Scotia                               | <a href="https://www.novascotiamidwives.ca/">https://www.novascotiamidwives.ca/</a>           |

## Online Supplementary Materials – Bombay et al.

|                                                                   |             |                                                                                                                                                           |
|-------------------------------------------------------------------|-------------|-----------------------------------------------------------------------------------------------------------------------------------------------------------|
| Government of Nova Scotia<br>Department of Health and<br>Wellness | Nova Scotia | <a href="https://novascotia.ca/dhw/">https://novascotia.ca/dhw/</a>                                                                                       |
| Nova Scotia Health Authority                                      | Nova Scotia | <a href="http://www.nshealth.ca/#">http://www.nshealth.ca/#</a>                                                                                           |
| Reproductive Care Program of<br>Nova Scotia                       | Nova Scotia | <a href="http://rcp.nshealth.ca/">http://rcp.nshealth.ca/</a>                                                                                             |
| Government of Nunavut                                             | Nunavut     | <a href="https://www.gov.nu.ca/">https://www.gov.nu.ca/</a>                                                                                               |
| Algoma Public Health Unit                                         | Ontario     | <a href="http://www.algomapublichealth.com/">http://www.algomapublichealth.com/</a>                                                                       |
| Best Start - Health Nexus                                         | Ontario     | <a href="https://en.beststart.org/">https://en.beststart.org/</a>                                                                                         |
| Brant County Health Unit                                          | Ontario     | <a href="http://www.bchu.org/">http://www.bchu.org/</a>                                                                                                   |
| Centre for Addiction and Mental<br>Health                         | Ontario     | <a href="http://www.camh.ca/">http://www.camh.ca/</a>                                                                                                     |
| Champlain Maternal Newborn<br>Regional Program                    | Ontario     | <a href="http://www.cmnrp.ca/en/cmnrp/Home_p2974.html">http://www.cmnrp.ca/en/cmnrp/Home_p2974.html</a>                                                   |
| Chatham-Kent Health Unit                                          | Ontario     | <a href="http://ckphu.com/">http://ckphu.com/</a>                                                                                                         |
| Durham Region Health<br>Department                                | Ontario     | <a href="https://www.durham.ca/en/health-and-wellness/health-and-wellness.aspx">https://www.durham.ca/en/health-and-wellness/health-and-wellness.aspx</a> |
| Eastern Ontario Health Unit                                       | Ontario     | <a href="http://www.eohu.ca/">http://www.eohu.ca/</a>                                                                                                     |
| Grey Bruce Health Unit                                            | Ontario     | <a href="http://www.publichealthgreybruce.on.ca/">http://www.publichealthgreybruce.on.ca/</a>                                                             |
| Haldimand-Norfolk Health Unit                                     | Ontario     | <a href="http://www.hnhu.org/">http://www.hnhu.org/</a>                                                                                                   |
| Haliburton, Kawartha, Pine<br>Ridge District Health Unit          | Ontario     | <a href="http://www.hkpr.on.ca/">http://www.hkpr.on.ca/</a>                                                                                               |
| Halton Region Health<br>Department                                | Ontario     | <a href="https://www.halton.ca/For-Residents/Public-Health">https://www.halton.ca/For-Residents/Public-Health</a>                                         |
| Hamilton Public Health Services                                   | Ontario     | <a href="http://www.hamilton.ca/publichealth">http://www.hamilton.ca/publichealth</a>                                                                     |

## Online Supplementary Materials – Bombay et al.

|                                                             |         |                                                                                                                                                                               |
|-------------------------------------------------------------|---------|-------------------------------------------------------------------------------------------------------------------------------------------------------------------------------|
| Hastings and Prince Edward<br>Counties Health Unit          | Ontario | <a href="https://hpepublichealth.ca/">https://hpepublichealth.ca/</a>                                                                                                         |
| Huron Perth District Health Unit                            | Ontario | <a href="http://www.hp-ph.ca/">http://www.hp-ph.ca/</a>                                                                                                                       |
| Kingston, Frontenac and Lennox<br>& Addington Public Health | Ontario | <a href="http://www.kflapublichealth.ca/">http://www.kflapublichealth.ca/</a>                                                                                                 |
| Lambton Public Health (Ontario)                             | Ontario | <a href="http://www.lambtonhealth.on.ca/">http://www.lambtonhealth.on.ca/</a>                                                                                                 |
| Leeds, Grenville and Lanark<br>District Health Unit         | Ontario | <a href="http://www.healthunit.org/">http://www.healthunit.org/</a>                                                                                                           |
| London Health Sciences Centre                               | Ontario | <a href="https://www.lhsc.on.ca/maternal-newborn-care/welcome-to-maternal-newborn-care-0">https://www.lhsc.on.ca/maternal-newborn-care/welcome-to-maternal-newborn-care-0</a> |
| Middlesex-London Health Unit                                | Ontario | <a href="http://www.healthunit.com/">http://www.healthunit.com/</a>                                                                                                           |
| Niagara Region Public Health<br>Department                  | Ontario | <a href="http://www.niagararegion.ca/health">http://www.niagararegion.ca/health</a>                                                                                           |
| North Bay Parry Sound District<br>Health Unit               | Ontario | <a href="http://www.myhealthunit.ca/">http://www.myhealthunit.ca/</a>                                                                                                         |
| Northwestern Health Unit                                    | Ontario | <a href="http://www.nwhu.on.ca/">http://www.nwhu.on.ca/</a>                                                                                                                   |
| Ontario Association of Midwives                             | Ontario | <a href="https://www.ontariomidwives.ca/">https://www.ontariomidwives.ca/</a>                                                                                                 |
| Ottawa Public Health                                        | Ontario | <a href="http://www.ottawapublichealth.ca/">http://www.ottawapublichealth.ca/</a>                                                                                             |
| Peel Public Health                                          | Ontario | <a href="http://www.peelregion.ca/health/">http://www.peelregion.ca/health/</a>                                                                                               |
| Peterborough Public Health                                  | Ontario | <a href="http://www.peterboroughpublichealth.ca/">http://www.peterboroughpublichealth.ca/</a>                                                                                 |
| Porcupine Health Unit                                       | Ontario | <a href="http://www.porcupinehu.on.ca/">http://www.porcupinehu.on.ca/</a>                                                                                                     |
| Provincial Council for Maternal<br>and Child Health         | Ontario | <a href="https://www.pcmch.on.ca/">https://www.pcmch.on.ca/</a>                                                                                                               |
| Public Health Ontario                                       | Ontario | <a href="https://www.publichealthontario.ca/">https://www.publichealthontario.ca/</a>                                                                                         |
| Region of Waterloo, Public<br>Health                        | Ontario | <a href="http://www.region.waterloo.on.ca/ph">http://www.region.waterloo.on.ca/ph</a>                                                                                         |

## Online Supplementary Materials – Bombay et al.

|                                            |                 |                                                                                                                                     |
|--------------------------------------------|-----------------|-------------------------------------------------------------------------------------------------------------------------------------|
| Renfrew County and District Health Unit    | Ontario         | <a href="http://www.rcdhu.com/">http://www.rcdhu.com/</a>                                                                           |
| Simcoe Muskoka District Health Unit        | Ontario         | <a href="http://www.simcoemuskokahealth.org/">http://www.simcoemuskokahealth.org/</a>                                               |
| Southwestern Public Health                 | Ontario         | <a href="https://www.swpublichealth.ca/">https://www.swpublichealth.ca/</a>                                                         |
| Sudbury & District Health Unit             | Ontario         | <a href="https://www.phsd.ca/">https://www.phsd.ca/</a>                                                                             |
| Sunnybrook Health Sciences Centre          | Ontario         | <a href="https://sunnybrook.ca/">https://sunnybrook.ca/</a>                                                                         |
| Thunder Bay District Health Unit           | Ontario         | <a href="http://www.tbdhu.com/">http://www.tbdhu.com/</a>                                                                           |
| Timiskaming Health Unit                    | Ontario         | <a href="http://www.timiskaminghu.com/">http://www.timiskaminghu.com/</a>                                                           |
| Toronto Public Health                      | Ontario         | <a href="http://www.toronto.ca/health/index.htm">http://www.toronto.ca/health/index.htm</a>                                         |
| Wellington-Dufferin-Guelph Public Health   | Ontario         | <a href="http://www.wdgppublichealth.ca/">http://www.wdgppublichealth.ca/</a>                                                       |
| Windsor-Essex County Health Unit (Ontario) | Ontario         | <a href="https://www.wechu.org/">https://www.wechu.org/</a>                                                                         |
| York Region Public Health Services         | Ontario         | <a href="http://www.york.ca/wps/portal/yorkhome/health/">http://www.york.ca/wps/portal/yorkhome/health/</a>                         |
| Association of Ontario Midwives            | Ontario         | <a href="https://www.ontariomidwives.ca/">https://www.ontariomidwives.ca/</a>                                                       |
| Monarch Maternal and Newborn Health        | Ontario         | <a href="http://www.monarchcentre.ca/">http://www.monarchcentre.ca/</a>                                                             |
| OMAMA                                      | Ontario         | <a href="https://www.omama.com/en/index.asp">https://www.omama.com/en/index.asp</a>                                                 |
| Ontario Prenatal Education                 | Ontario         | <a href="https://www.ontarioprenataleducation.ca/medications-drugs/">https://www.ontarioprenataleducation.ca/medications-drugs/</a> |
| Prenatal Screening Ontario                 | Ontario         | <a href="https://www.prenatalscreeningontario.ca/en/psso/index.aspx">https://www.prenatalscreeningontario.ca/en/psso/index.aspx</a> |
| Mothercraft                                | Ottawa, Ontario | <a href="http://mothercraft.com/">http://mothercraft.com/</a>                                                                       |

## Online Supplementary Materials – Bombay et al.

|                                         |                      |                                                                                               |
|-----------------------------------------|----------------------|-----------------------------------------------------------------------------------------------|
| Ottawa Birth and Wellness Centre        | Ottawa, Ontario      | <a href="https://ottawabirthcentre.ca/">https://ottawabirthcentre.ca/</a>                     |
| The Royal                               | Ottawa, Ontario      | <a href="https://www.theroyal.ca/">https://www.theroyal.ca/</a>                               |
| Government of Prince Edward Island      | Prince Edward Island | <a href="https://www.princeedwardisland.ca/en">https://www.princeedwardisland.ca/en</a>       |
| Encadrement du cannabis au Quebec       | Quebec               | <a href="https://encadrementcannabis.gouv.qc.ca/">https://encadrementcannabis.gouv.qc.ca/</a> |
| Quebec.ca                               | Quebec               | <a href="https://www.quebec.ca/en/">https://www.quebec.ca/en/</a>                             |
| Regroupement Les Sages-femmes du Quebec | Quebec               | <a href="https://www.rsfq.qc.ca/">https://www.rsfq.qc.ca/</a>                                 |
| Santé Montreal                          | Quebec               | <a href="https://santemontreal.qc.ca/en/">https://santemontreal.qc.ca/en/</a>                 |
| Government of Saskatchewan              | Saskatchewan         | <a href="https://www.saskatchewan.ca/">https://www.saskatchewan.ca/</a>                       |
| Midwives Association of Saskatchewan    | Saskatchewan         | <a href="https://www.saskatchewanmidwives.com/">https://www.saskatchewanmidwives.com/</a>     |
| Government of Yukon                     | Yukon                | <a href="http://www.gov.yk.ca/">http://www.gov.yk.ca/</a>                                     |
