# Supplementary material
Source: HighWire-hosted journal article supplement (https://bmjopen.bmj.com/content/11/2/e045006)
Supplement: inline-supplementary-material-3 [file inline-supplementary-material-3.pdf]

### Online Supplementary Appendix 3

#### Search strategy for target organization websites

One independent reviewer will apply the following search strategy to the websites of target organizations, listed in Appendix 2

- Searches will be conducted using website internal search engines
- Search concepts:
  - Concept 1: Cannabis, Marijuana, marihuana, cannabinoid
  - Concept 2: fertility, infertility, conception, conceive
  - Concept 3: pregnancy, pregnant, fetus, baby, newborn, prenatal, pre-natal, perinatal, peri-natal, antenatal, ante-natal, postnatal, post-natal
  - Concept 4: breast milk, breastmilk, chest milk, chestmilk, human milk, breastfeeding, lactation
- For websites that do not have internal search engines, searches will be conducted manually using website main menus and sub-menus.

Searches will be validated by a second independent reviewer.
