# Supplementary material
Source: HighWire-hosted journal article supplement (https://bmjopen.bmj.com/content/11/2/e045006)
Supplement: inline-supplementary-material-4 [file inline-supplementary-material-4.pdf]

## Online Supplementary Appendix 4

### Grey Literature Screening Tool

|                                                                                                                                                                                                                                                                                                                                                                     |                |
|---------------------------------------------------------------------------------------------------------------------------------------------------------------------------------------------------------------------------------------------------------------------------------------------------------------------------------------------------------------------|----------------|
| <b>1. Did the search produce any potentially eligible resources?</b>                                                                                                                                                                                                                                                                                                | Yes/No         |
| <p>If 'yes' to Question 1, proceed to Question 2</p> <p>If 'no' to Question 1, exclude</p>                                                                                                                                                                                                                                                                          |                |
| <b>2. What is the title of this resource?</b>                                                                                                                                                                                                                                                                                                                       | Insert title   |
| What is the URL of this specific webpage?                                                                                                                                                                                                                                                                                                                           | Paste URL Link |
| <b>3. Is this an educational resource that describes information about cannabis use and fertility, pregnancy/the developing child or breastmilk/breastfeeding infant?</b>                                                                                                                                                                                           | Yes/No         |
| <p>If 'yes' to Question 3, proceed to Data Extraction.</p> <p>If 'yes', what does it provide recommendations or guidance on? (check all that apply)</p> <p><input type="checkbox"/> Fertility</p> <p><input type="checkbox"/> Pregnancy/developing child</p> <p><input type="checkbox"/> Breast milk/breastfeeding child</p> <p>If 'no' to Question 3, exclude.</p> |                |
