# Supplementary material
Source: HighWire-hosted journal article supplement (https://bmjopen.bmj.com/content/11/2/e045006)
Supplement: inline-supplementary-material-5 [file inline-supplementary-material-5.pdf]

Online Supplementary Materials – Bombay et al.

## Online Supplementary Appendix 5

### Title and Abstract Screening Tool

|                                                                                                                        |                   |
|------------------------------------------------------------------------------------------------------------------------|-------------------|
|                                                                                                                        | <b>Resource 1</b> |
| <b>1. Is this record...</b>                                                                                            |                   |
| In English or French?                                                                                                  | Yes/No            |
| If 'no' to Question 1, exclude.                                                                                        |                   |
| <b>2. Does this record...</b>                                                                                          |                   |
| Describe information about cannabis use and fertility or pregnancy/developing child or breastmilk/breastfeeding infant | Yes/No/Unsure     |
| If 'yes' or 'unsure' to question 2, proceed to Full text screening                                                     |                   |
| If 'no' to question 2, exclude.                                                                                        |                   |
