# Supplementary material
Source: HighWire-hosted journal article supplement (https://bmjopen.bmj.com/content/11/2/e045006)
Supplement: inline-supplementary-material-6 [file inline-supplementary-material-6.pdf]

Online Supplementary Materials – Bombay et al.

## Online Supplementary Appendix 6

Full-text Screening Tool (for clinical guidelines and recommendations)

|                                                                                                                                                                                                                                                                                                                       |                   |
|-----------------------------------------------------------------------------------------------------------------------------------------------------------------------------------------------------------------------------------------------------------------------------------------------------------------------|-------------------|
|                                                                                                                                                                                                                                                                                                                       | <b>Resource 1</b> |
| <b>1. Is the full text of the record available?</b>                                                                                                                                                                                                                                                                   | Yes/No            |
| <p>If 'yes' to Question 1, proceed to question 2.</p> <p>If 'no' to Question 1, exclude</p>                                                                                                                                                                                                                           |                   |
| <b>2. Is the full text of the record available in English or French?</b>                                                                                                                                                                                                                                              | Yes/No            |
| <p>If 'yes' to Question 2, proceed to question 3.</p> <p>If 'no' to Question 2, exclude</p>                                                                                                                                                                                                                           |                   |
| <b>3. Was it published within the last 10 years? (2010 or later)</b>                                                                                                                                                                                                                                                  | Yes/No            |
| <p>If 'yes' to Question 3, proceed to question 4.</p> <p>If 'no' to Question 3, exclude</p>                                                                                                                                                                                                                           |                   |
| <b>4. Is this a primary research study (involving humans or animals), literature review (systematic or unsystematic), editorial or opinion piece?</b>                                                                                                                                                                 | Yes/No            |
| <p>If 'yes' to Question 4, exclude.</p> <p>If 'yes', which is it? (check all that apply)</p> <p><input type="checkbox"/> Primary research study</p> <p><input type="checkbox"/> Literature review</p> <p><input type="checkbox"/> Editorial or opinion piece</p> <p>If 'no' to Question 4, proceed to Question 5.</p> |                   |
| <b>5. Was this resource produced by a Canadian Organization?</b>                                                                                                                                                                                                                                                      | Yes/No/Unsure     |
| <p>If 'yes' or 'unsure' to Question 5, proceed to Question 6.</p> <p>If 'no' to Question 5, exclude.</p>                                                                                                                                                                                                              |                   |
| <b>6. Does the information in this resource appear to target Canadian healthcare providers or the Canadian public?</b>                                                                                                                                                                                                | Yes/No/Unsure     |
| <p>If 'yes' or 'unsure' to Question 6, proceed to Question 7.</p> <p>If 'yes', which does it target? (check all that apply)</p> <p><input type="checkbox"/> Canadian health care providers</p>                                                                                                                        |                   |

## Online Supplementary Materials – Bombay et al.

|                                                                                                                                                                                                                                                                                                                                                      |               |
|------------------------------------------------------------------------------------------------------------------------------------------------------------------------------------------------------------------------------------------------------------------------------------------------------------------------------------------------------|---------------|
| <input type="checkbox"/> Canadian public<br>If 'no' to Question 6, exclude.                                                                                                                                                                                                                                                                          |               |
| <b>7. Does this resource provide recommendations, guidance or report on the safety of cannabis use on fertility, pregnancy/developing child, or breast milk/breastfeeding child</b>                                                                                                                                                                  | Yes/No/Unsure |
| If 'yes' or 'unsure' to Question 7, proceed to Data Extraction.<br>If 'yes', what does it provide recommendations or guidance on? (check all that apply)<br><input type="checkbox"/> Fertility<br><input type="checkbox"/> Pregnancy/developing child<br><input type="checkbox"/> Breast milk/breastfeeding child<br>If 'no' to Question 7, exclude. |               |
