# Supplementary material
Source: HighWire-hosted journal article supplement (https://bmjopen.bmj.com/content/11/2/e045006)
Supplement: inline-supplementary-material-7 [file inline-supplementary-material-7.pdf]

Online Supplementary Materials – Bombay et al.

## Online Supplementary Appendix 7

Data Extraction

| <b>Bibliometric Characteristics</b>                                                                                                                  |        |
|------------------------------------------------------------------------------------------------------------------------------------------------------|--------|
| <b>What is the title of the resource?</b>                                                                                                            |        |
| <b>Is this resource available from a webpage?</b>                                                                                                    | Yes/No |
| If yes, at what URL can this resource be found?                                                                                                      |        |
| If yes, what is the publishing organization, institution or society? (if applicable)                                                                 |        |
| If yes, who is the named author of the resource (if applicable)?                                                                                     |        |
| If yes, when was the webpage last updated? (if available)                                                                                            |        |
| <b>Is this resource published in an academic journal?</b>                                                                                            | Yes/No |
| If yes, who is the corresponding author of this resource? If there is more than one corresponding author listed, extract the first listed.           |        |
| If yes, what is the email of the corresponding author? If there is more than one corresponding author listed, extract the email of the first listed. |        |
| If yes, in what journal was this resource published?                                                                                                 |        |
| If yes, is this resource a clinical guideline from a professional organization, institution or society?                                              |        |
| If yes, what is the publishing organization, institution or society? (if applicable)                                                                 |        |
| If yes, is this resource available open access?                                                                                                      | Yes/No |
| <b>Acknowledgement of external contributors</b>                                                                                                      |        |

## Online Supplementary Materials – Bombay et al.

|                                                                                         |                                |
|-----------------------------------------------------------------------------------------|--------------------------------|
| Does the resource specify contributions from patient partners or the public?            | Yes/No. If yes, please specify |
| Does this resource specify contributions from outside organizations or other resources? | Yes/No. If yes, please specify |
| <b>What is the date of first publication?</b>                                           | Month-year, if available       |
| <b>What date was this resource accessed for data extraction?</b>                        | Day-month-year                 |
| <b>Goal of the resource</b>                                                             |                                |
| <b>Is the goal of this resource clearly stated?</b>                                     | Yes/No                         |
| If yes, what is the goal?                                                               |                                |
| If no, what do you think that the goal is?                                              |                                |
| <b>Resource Characteristics</b>                                                         |                                |
| <b>Resource format</b>                                                                  |                                |
| Is this resource available as content within a webpage?                                 | Yes/No                         |
| If yes, how many words does this resource include?                                      | #                              |
| Is this resource available as pdf document?                                             | Yes/No                         |
| If yes, how many pages is the pdf document?                                             | #                              |
| <b>Aesthetic features</b>                                                               |                                |
| Is this resource exclusively text based?                                                | Yes/No                         |
| Does this resource include images?                                                      | Yes/No                         |
| If yes, how many?                                                                       | #                              |
| If yes, how many of the images are infographics (images that include text and numbers)  | #                              |
| Does this resource include videos?                                                      | Yes/No                         |
| If yes, how many videos?                                                                | #                              |

## Online Supplementary Materials – Bombay et al.

|                                                                                                                                                                                                                                                                                                               |                                                                                                                             |
|---------------------------------------------------------------------------------------------------------------------------------------------------------------------------------------------------------------------------------------------------------------------------------------------------------------|-----------------------------------------------------------------------------------------------------------------------------|
| If yes, what organization developed the video?                                                                                                                                                                                                                                                                | Name the organization claiming responsibility for the video, or indicate 'can't tell'                                       |
| <b>Level of Jurisdiction</b>                                                                                                                                                                                                                                                                                  |                                                                                                                             |
| Does this resource come from a National organization?                                                                                                                                                                                                                                                         | Yes/No                                                                                                                      |
| Does this resource come from a provincial organization?                                                                                                                                                                                                                                                       | Yes/No                                                                                                                      |
| Does this resource come from a lower level organization<br>(e.g. community organization, regional health authority,<br>public health unit)                                                                                                                                                                    | Yes/No                                                                                                                      |
| <b>Language(s) of resource</b>                                                                                                                                                                                                                                                                                |                                                                                                                             |
| Is this resource available in English?                                                                                                                                                                                                                                                                        | Yes/No                                                                                                                      |
| Is this resource available in French?                                                                                                                                                                                                                                                                         | Yes/No                                                                                                                      |
| If other, please specify.                                                                                                                                                                                                                                                                                     |                                                                                                                             |
| <b>For online resources, how easy was it to find the resource from the parent organization website?</b>                                                                                                                                                                                                       | Very easy – specify reason<br>Easy – specify reason<br>Not easy – specify reason<br>Not applicable – not an online resource |
| <b>What is the measure of Gobbledygook?</b><br><br>Copy the first paragraph up to no more than 100 words of text into the tool available at the following URL:<br><br><a href="https://readabilityformulas.com/smog-readability-formula.php">https://readabilityformulas.com/smog-readability-formula.php</a> |                                                                                                                             |
| <b>Is target audience specified? (Yes/no)</b>                                                                                                                                                                                                                                                                 | Yes/No                                                                                                                      |
| If yes, is the target audience clinicians?                                                                                                                                                                                                                                                                    | Yes/No                                                                                                                      |
| If yes, is the target audience the public?                                                                                                                                                                                                                                                                    | Yes/No                                                                                                                      |
| If no, do you think the target audience is clinicians?                                                                                                                                                                                                                                                        | Yes/No                                                                                                                      |
| If no, do you think the target audience is the public?                                                                                                                                                                                                                                                        | Yes/No                                                                                                                      |

## Online Supplementary Materials – Bombay et al.

|                                                                                                                                                                          |                                                     |
|--------------------------------------------------------------------------------------------------------------------------------------------------------------------------|-----------------------------------------------------|
| <b>What terminology is used in this resource related to cannabis?</b> (Cannabis, cannabinoid, cannabidiol, marijuana, pot, weed, hash, THC, other – please specify etc.) |                                                     |
| <b>Cannabis exposure time frame:</b>                                                                                                                                     |                                                     |
| Does this resource speak to cannabis use before pregnancy?                                                                                                               | Yes/No                                              |
| Does this resource speak to cannabis use in pregnancy?                                                                                                                   | Yes/No                                              |
| Does this resource speak to cannabis use in breastfeeding?                                                                                                               | Yes/No                                              |
| <b>Type of cannabis use:</b>                                                                                                                                             |                                                     |
| Do this resource speak to medicinal cannabis use?                                                                                                                        | Yes/No                                              |
| Do this resource speak to use for nausea in pregnancy?                                                                                                                   | Yes/No                                              |
| <b>Effects of cannabis use:</b>                                                                                                                                          |                                                     |
| Do they mention effects on the exposed fetus and/or newborn?                                                                                                             | Yes/No.<br>If yes- specify, include relevant quotes |
| Does it speak to effects on the mother's body during pregnancy?                                                                                                          | Yes/No.<br>If yes- specify, include relevant quotes |
| Does it speak to effect on mother's breast milk?                                                                                                                         | Yes/No.<br>If yes- specify, include relevant quotes |
| Does it speak to effect on breastfeeding infant?                                                                                                                         | Yes/No.<br>If yes- specify, include relevant quotes |
| Does it speak to the effect on male fertility?                                                                                                                           | Yes/No.                                             |

## Online Supplementary Materials – Bombay et al.

|                                                                                                                                                           |                                                         |
|-----------------------------------------------------------------------------------------------------------------------------------------------------------|---------------------------------------------------------|
|                                                                                                                                                           | If yes- specify, include relevant quotes                |
| Does it speak to effect on female fertility?                                                                                                              | Yes/No.<br><br>If yes- specify, include relevant quotes |
| <b>Cited evidence gaps</b>                                                                                                                                |                                                         |
| Does this resource identify a lack of evidence, data or information regarding the effect or safety of cannabis on male or female fertility?               | Yes/No.<br><br>If yes- specify, include relevant quotes |
| Does this resource identify a lack of evidence, data or information regarding the effect or safety of cannabis on pregnancy or the developing child?      | Yes/No.<br><br>If yes- specify, include relevant quotes |
| Does this resource identify a lack of evidence, data or information regarding the effect or safety of cannabis on breastmilk or the breastfeeding infant? | Yes/No.<br><br>If yes- specify, include relevant quotes |
| <b>General Recommendation of this resource:</b>                                                                                                           |                                                         |
| For maternal use while trying to get pregnant                                                                                                             | include quotes when possible                            |
| For paternal use while trying to get pregnant                                                                                                             | include quotes when possible                            |
| For use while pregnant                                                                                                                                    | include quotes when possible                            |
| For use while breastfeeding                                                                                                                               | include quotes when possible                            |
| <b>Does this resource include links to external webpages/resources?</b>                                                                                   | Yes/No.                                                 |
| If yes, list the URLs of the linked resources here, and screen them for eligibility for inclusion in the scoping review.                                  |                                                         |
| <b>Notes:</b>                                                                                                                                             |                                                         |
